# Supplementary material for: Solar Radiation Models and Gridded Databases to Fill Gaps in Weather Series and to Project Climate Change in Brazil
Source: Hindawi journal article supplement (doi:10.1155/2018/6204382), 2018-07-05
Supplement: f1 [file 6204382.f1.pdf]

## Supplementary Materials

Table S1: Weather stations from Brazilian National Institute of Meteorology used in the present study, with the name, state, ID, geographical coordinates, altitude and percentage of missing data on air temperature (Temp.), sunshine hours (n), rainfall (Rain), relative humidity (RH) and wind speed (WS<sub>2m</sub>) in the period from 1980 to 2009.

| Site, state               | ID   | Lat. (°) | Long. (°) | Alt. (m) | Temp. | n     | Rain  | RH    | WS <sub>2m</sub> | Total |
|---------------------------|------|----------|-----------|----------|-------|-------|-------|-------|------------------|-------|
| 1-Pelotas, RS             | RSPE | -31.78   | -52.41    | 13       | 48.78 | 44.64 | 44.61 | 44.73 | 45.52            | 45.66 |
| 2-Cruz Alta, RS           | RSCA | -28.63   | -53.60    | 473      | 25.53 | 28.46 | 25.49 | 33.02 | 27.51            | 28.00 |
| 3-Campos Novos, SC        | SCCN | -27.38   | -51.20    | 947      | 25.18 | 27.67 | 25.31 | 26.18 | 25.62            | 25.99 |
| 4-Chapecó, SC             | SCCH | -27.11   | -52.61    | 679      | 21.14 | 22.18 | 20.94 | 22.22 | 21.73            | 21.64 |
| 5-Castro, PR              | PRCA | -24.78   | -50.00    | 1009     | 20.78 | 38.60 | 16.53 | 19.84 | 16.10            | 22.37 |
| 6-Londrina, PR            | PRLO | -23.31   | -51.13    | 566      | 19.71 | 48.41 | 18.63 | 33.38 | 31.05            | 30.24 |
| 7-Avaré, SP               | SPAV | -23.08   | -48.91    | 854      | 28.30 | 92.89 | 18.36 | 57.50 | 18.86            | 43.18 |
| 8-Franca, SP              | SPFR | -20.58   | -47.36    | 1026     | 0.91  | 4.02  | 0.03  | 0.05  | 0.00             | 1.00  |
| 9-Votuporanga, SP         | SPVO | -20.41   | -49.98    | 503      | 11.46 | 29.89 | 10.18 | 11.02 | 19.26            | 16.36 |
| 10-BambuÍ, MG             | MGBA | -20.03   | -45.00    | 661      | 20.96 | 14.16 | 13.45 | 14.08 | 13.54            | 15.24 |
| 11-Uberaba, MG            | MGUB | -19.73   | -47.95    | 737      | 21.00 | 22.88 | 20.63 | 21.38 | 20.96            | 21.37 |
| 12-Patos de Minas, MG     | MGPM | -18.51   | -46.43    | 940      | 22.39 | 25.84 | 22.24 | 22.44 | 22.21            | 23.02 |
| 13-Unai, MG               | MGUN | -16.36   | -46.88    | 460      | 10.06 | 18.88 | 9.67  | 10.21 | 9.63             | 11.69 |
| 14-Ivinhema, MS           | MSIV | -22.30   | -53.81    | 369      | 42.19 | 38.59 | 38.64 | 42.42 | 39.04            | 40.18 |
| 15-Paranaíba, MS          | MSPA | -19.75   | -51.18    | 331      | 32.12 | 25.71 | 25.42 | 32.94 | 25.30            | 28.30 |
| 16-Diamantino, MT         | MTDI | -14.40   | -56.45    | 286      | 17.69 | 62.10 | 10.50 | 47.80 | 29.92            | 33.60 |
| 17-Catalão, GO            | GOCA | -18.18   | -47.95    | 840      | 5.61  | 7.08  | 7.63  | 7.65  | 1.39             | 5.87  |
| 18-JataÍ, GO              | GOJA | -17.91   | -51.71    | 663      | 2.62  | 4.00  | 1.43  | 3.37  | 45.91            | 11.47 |
| 19-Brasília, DF           | DFBR | -15.78   | -47.92    | 1160     | 0.97  | 1.21  | 1.01  | 1.13  | 0.88             | 1.04  |
| 20-Bom Jesus da Lapa, BA  | BABJ | -13.26   | -43.41    | 440      | 27.54 | 31.01 | 27.27 | 28.03 | 28.32            | 28.43 |
| 21-Barreiras, BA          | BABA | -12.15   | -45.00    | 439      | 37.48 | 51.60 | 25.32 | 38.33 | 25.30            | 35.61 |
| 22-Barra, BA              | BARR | -11.08   | -43.16    | 402      | 29.31 | 28.49 | 27.60 | 27.67 | 28.86            | 28.39 |
| 23-Bom Jesus do Piauí, PI | PIBJ | -9.10    | -44.11    | 332      | 11.54 | 14.39 | 11.84 | 26.75 | 29.07            | 18.72 |
| 24-Alto Parnaíba, MA      | MAAP | -9.10    | -45.93    | 285      | 7.63  | 8.84  | 3.08  | 20.50 | 21.52            | 12.31 |
| 25-Carolina, MA           | MACA | -7.33    | -47.46    | 193      | 5.25  | 6.43  | 4.44  | 16.68 | 16.24            | 9.81  |
| 26-Barra do Corda, MA     | MABC | -5.50    | -45.23    | 153      | 7.43  | 7.46  | 3.06  | 15.92 | 16.15            | 10.00 |
| 27-Taguatinga, TO         | TOTA | -12.40   | -46.41    | 604      | 8.31  | 14.98 | 15.26 | 15.87 | 4.49             | 11.78 |
| 28-Porto Nacional, TO     | TOPN | -10.71   | -48.41    | 239      | 9.97  | 23.83 | 10.91 | 19.50 | 5.66             | 13.97 |
| 29-Pedro Afonso, TO       | TOPA | -8.96    | -48.18    | 187      | 3.22  | 3.65  | 2.14  | 9.31  | 2.06             | 4.08  |
| 30-São Félix do Xingu, PA | PASF | -6.63    | -51.96    | 206      | 31.12 | 31.82 | 29.11 | 42.17 | 31.97            | 33.24 |
| 31-Marabá, PA             | PAMA | -5.36    | -49.13    | 95       | 3.94  | 35.58 | 3.22  | 14.33 | 6.00             | 12.61 |

\*Lat. – latitude; Long. – longitude; Alt. – altitude

Table S2: Statistical performance of temperature-based solar radiation models in 31 Brazilian locations: Hargreaves (Ha), Hunt (Hu) and Annandale (An).

| Sites | Ha             |      |      |                                              |      | Hu             |      |      |                                              |      | An             |      |      |                                              |      |
|-------|----------------|------|------|----------------------------------------------|------|----------------|------|------|----------------------------------------------|------|----------------|------|------|----------------------------------------------|------|
|       | r <sup>2</sup> | d    | c    | Bias<br>(MJm <sup>-2</sup> d <sup>-1</sup> ) | MAE  | r <sup>2</sup> | d    | c    | Bias<br>(MJm <sup>-2</sup> d <sup>-1</sup> ) | MAE  | r <sup>2</sup> | d    | c    | Bias<br>(MJm <sup>-2</sup> d <sup>-1</sup> ) | MAE  |
| RSPE  | 0.73           | 0.90 | 0.77 | -0.43                                        | 3.21 | 0.73           | 0.91 | 0.78 | -0.61                                        | 3.17 | 0.73           | 0.90 | 0.77 | -0.44                                        | 3.21 |
| RSCA  | 0.77           | 0.93 | 0.81 | -1.16                                        | 3.12 | 0.77           | 0.93 | 0.82 | 0.20                                         | 2.92 | 0.77           | 0.92 | 0.81 | 0.23                                         | 3.02 |
| SCCN  | 0.71           | 0.91 | 0.76 | 0.42                                         | 3.03 | 0.71           | 0.91 | 0.77 | 0.48                                         | 3.02 | 0.71           | 0.90 | 0.76 | 0.18                                         | 3.09 |
| SCCH  | 0.73           | 0.92 | 0.78 | 0.21                                         | 2.88 | 0.73           | 0.92 | 0.78 | 0.45                                         | 2.96 | 0.73           | 0.91 | 0.78 | 0.23                                         | 3.03 |
| PRCA  | 0.67           | 0.89 | 0.72 | 0.14                                         | 2.13 | 0.67           | 0.89 | 0.73 | 0.39                                         | 1.89 | 0.67           | 0.88 | 0.72 | 0.17                                         | 1.90 |
| PRLO  | 0.63           | 0.88 | 0.69 | 0.34                                         | 2.09 | 0.63           | 0.88 | 0.70 | 0.59                                         | 2.21 | 0.63           | 0.87 | 0.69 | 0.51                                         | 2.25 |
| SPAV  | 0.58           | 0.85 | 0.65 | -0.26                                        | 2.42 | 0.58           | 0.85 | 0.65 | -0.14                                        | 2.48 | 0.58           | 0.85 | 0.65 | -0.47                                        | 2.53 |
| SPFR  | 0.59           | 0.72 | 0.58 | -0.48                                        | 2.60 | 0.59           | 0.72 | 0.56 | -0.28                                        | 2.58 | 0.59           | 0.76 | 0.58 | -0.74                                        | 2.70 |
| SPVP  | 0.60           | 0.84 | 0.66 | -0.55                                        | 2.88 | 0.60           | 0.84 | 0.65 | -0.23                                        | 3.13 | 0.60           | 0.85 | 0.66 | -0.60                                        | 3.19 |
| MGBB  | 0.56           | 0.83 | 0.60 | -0.67                                        | 2.92 | 0.56           | 0.83 | 0.62 | -0.67                                        | 3.02 | 0.56           | 0.80 | 0.60 | -0.97                                        | 3.15 |
| MGUB  | 0.54           | 0.82 | 0.60 | -0.24                                        | 2.63 | 0.54           | 0.82 | 0.60 | -0.10                                        | 2.91 | 0.54           | 0.82 | 0.60 | -0.53                                        | 2.99 |
| MGPM  | 0.62           | 0.77 | 0.62 | 0.43                                         | 2.60 | 0.62           | 0.77 | 0.60 | 0.61                                         | 2.92 | 0.62           | 0.79 | 0.62 | 0.09                                         | 2.96 |
| MGUN  | 0.50           | 0.80 | 0.56 | -0.39                                        | 2.23 | 0.50           | 0.80 | 0.57 | -0.42                                        | 2.60 | 0.50           | 0.79 | 0.56 | -0.67                                        | 2.67 |
| MSIV  | 0.57           | 0.85 | 0.63 | 0.29                                         | 3.20 | 0.57           | 0.85 | 0.64 | 0.22                                         | 3.33 | 0.57           | 0.83 | 0.63 | 0.10                                         | 3.38 |
| MSPA  | 0.55           | 0.85 | 0.61 | -0.03                                        | 2.76 | 0.55           | 0.85 | 0.63 | -0.01                                        | 2.90 | 0.55           | 0.83 | 0.61 | -0.11                                        | 2.94 |
| MTDI  | 0.51           | 0.68 | 0.50 | 0.29                                         | 2.80 | 0.51           | 0.68 | 0.48 | 0.25                                         | 2.89 | 0.51           | 0.70 | 0.50 | 0.09                                         | 2.86 |
| GOCA  | 0.80           | 0.80 | 0.71 | -0.31                                        | 2.57 | 0.80           | 0.80 | 0.72 | -0.39                                        | 2.86 | 0.80           | 0.80 | 0.71 | -0.83                                        | 2.96 |
| GOJA  | 0.57           | 0.76 | 0.56 | 0.08                                         | 2.51 | 0.57           | 0.76 | 0.57 | 0.04                                         | 2.66 | 0.57           | 0.75 | 0.56 | -0.29                                        | 2.70 |
| DFBR  | 0.50           | 0.67 | 0.50 | -0.11                                        | 3.03 | 0.50           | 0.67 | 0.47 | 0.15                                         | 3.11 | 0.50           | 0.71 | 0.50 | -0.54                                        | 3.20 |
| BABJ  | 0.75           | 0.72 | 0.63 | -0.28                                        | 2.55 | 0.75           | 0.72 | 0.62 | 0.20                                         | 2.76 | 0.75           | 0.72 | 0.63 | -0.07                                        | 2.81 |
| BABA  | 0.65           | 0.82 | 0.64 | 0.02                                         | 2.30 | 0.65           | 0.82 | 0.66 | 0.07                                         | 2.45 | 0.65           | 0.80 | 0.64 | -0.17                                        | 2.49 |
| BARR  | 0.60           | 0.85 | 0.63 | -0.05                                        | 1.95 | 0.60           | 0.85 | 0.65 | -0.16                                        | 2.36 | 0.60           | 0.82 | 0.63 | -0.43                                        | 2.49 |
| PIBJ  | 0.33           | 0.44 | 0.31 | -0.28                                        | 3.16 | 0.33           | 0.44 | 0.25 | 0.23                                         | 3.09 | 0.33           | 0.55 | 0.31 | -0.21                                        | 3.33 |
| MAAP  | 0.76           | 0.82 | 0.70 | 0.18                                         | 2.30 | 0.76           | 0.82 | 0.72 | 0.13                                         | 2.68 | 0.76           | 0.80 | 0.70 | -0.04                                        | 2.72 |
| MACA  | 0.51           | 0.80 | 0.56 | 0.39                                         | 3.04 | 0.51           | 0.80 | 0.57 | 0.48                                         | 3.08 | 0.51           | 0.78 | 0.56 | 0.39                                         | 3.09 |
| MABC  | 0.54           | 0.72 | 0.46 | -1.22                                        | 2.64 | 0.54           | 0.72 | 0.53 | -1.02                                        | 2.85 | 0.54           | 0.63 | 0.46 | -0.83                                        | 2.95 |
| TOTA  | 0.57           | 0.73 | 0.56 | -0.75                                        | 2.80 | 0.57           | 0.73 | 0.55 | -0.61                                        | 3.08 | 0.57           | 0.75 | 0.56 | -0.94                                        | 3.17 |
| TOPN  | 0.63           | 0.83 | 0.62 | -0.09                                        | 2.93 | 0.63           | 0.83 | 0.66 | -0.05                                        | 3.05 | 0.63           | 0.78 | 0.62 | -0.22                                        | 3.12 |
| TOPA  | 0.71           | 0.84 | 0.68 | -0.16                                        | 2.27 | 0.71           | 0.84 | 0.71 | 0.02                                         | 2.31 | 0.71           | 0.81 | 0.68 | 0.01                                         | 2.30 |
| PASF  | 0.35           | 0.52 | 0.33 | 1.33                                         | 3.14 | 0.35           | 0.52 | 0.31 | 1.33                                         | 3.28 | 0.35           | 0.55 | 0.33 | 1.23                                         | 3.21 |
| PAMA  | 0.55           | 0.79 | 0.54 | -0.88                                        | 2.74 | 0.55           | 0.79 | 0.59 | -0.75                                        | 3.02 | 0.55           | 0.73 | 0.54 | -0.71                                        | 3.17 |
| Mean  | 0.60           | 0.79 | 0.61 | -0.14                                        | 2.69 | 0.60           | 0.79 | 0.62 | 0.01                                         | 2.82 | 0.60           | 0.79 | 0.61 | -0.21                                        | 2.89 |

Table S3: Statistical performance of temperature-based solar radiation models in 31 Brazilian locations: Bristow-Campbell (BC) e Donatelli-Campbell (DC).

| Sites | BC             |      |      |                                              |      | DC             |      |      |                                              |      |
|-------|----------------|------|------|----------------------------------------------|------|----------------|------|------|----------------------------------------------|------|
|       | r <sup>2</sup> | d    | c    | Bias<br>(MJm <sup>-2</sup> d <sup>-1</sup> ) | MAE  | r <sup>2</sup> | d    | c    | Bias<br>(MJm <sup>-2</sup> d <sup>-1</sup> ) | MAE  |
| RSPE  | 0.69           | 0.90 | 0.75 | -0.68                                        | 3.30 | 0.66           | 0.88 | 0.72 | -1.31                                        | 3.56 |
| RSCA  | 0.77           | 0.93 | 0.81 | -1.16                                        | 3.14 | 0.76           | 0.93 | 0.80 | -0.89                                        | 3.12 |
| SCCN  | 0.72           | 0.92 | 0.78 | 0.42                                         | 2.85 | 0.70           | 0.91 | 0.76 | 0.34                                         | 3.03 |
| SCCH  | 0.73           | 0.92 | 0.79 | 0.21                                         | 2.85 | 0.72           | 0.92 | 0.78 | 0.29                                         | 2.88 |
| PRCA  | 0.68           | 0.90 | 0.75 | 0.14                                         | 1.83 | 0.64           | 0.89 | 0.71 | 0.34                                         | 2.13 |
| PRLO  | 0.70           | 0.91 | 0.76 | 0.34                                         | 1.88 | 0.67           | 0.90 | 0.73 | 0.48                                         | 2.09 |
| SPAV  | 0.63           | 0.88 | 0.70 | -0.26                                        | 2.29 | 0.60           | 0.87 | 0.68 | -0.21                                        | 2.42 |
| SPFR  | 0.56           | 0.85 | 0.64 | -0.48                                        | 2.40 | 0.41           | 0.79 | 0.51 | -0.54                                        | 2.60 |
| SPVP  | 0.65           | 0.88 | 0.71 | -0.55                                        | 2.85 | 0.64           | 0.89 | 0.71 | -0.46                                        | 2.88 |
| MGBB  | 0.65           | 0.87 | 0.70 | -0.67                                        | 2.62 | 0.61           | 0.86 | 0.67 | -0.98                                        | 2.92 |
| MGUB  | 0.63           | 0.89 | 0.70 | -0.24                                        | 2.45 | 0.62           | 0.88 | 0.69 | -0.30                                        | 2.63 |
| MGPM  | 0.61           | 0.87 | 0.68 | 0.43                                         | 2.38 | 0.53           | 0.84 | 0.61 | 0.34                                         | 2.60 |
| MGUN  | 0.63           | 0.88 | 0.70 | -0.39                                        | 2.10 | 0.61           | 0.88 | 0.68 | -0.57                                        | 2.23 |
| MSIV  | 0.58           | 0.86 | 0.66 | 0.29                                         | 3.12 | 0.59           | 0.87 | 0.66 | 0.16                                         | 3.20 |
| MSPA  | 0.55           | 0.85 | 0.63 | -0.03                                        | 2.76 | 0.57           | 0.87 | 0.66 | -0.12                                        | 2.76 |
| MTDI  | 0.54           | 0.81 | 0.59 | 0.29                                         | 2.65 | 0.48           | 0.81 | 0.56 | 0.08                                         | 2.80 |
| GOCA  | 0.79           | 0.93 | 0.82 | -0.31                                        | 2.38 | 0.69           | 0.91 | 0.75 | -0.49                                        | 2.57 |
| GOJA  | 0.58           | 0.83 | 0.63 | 0.08                                         | 2.40 | 0.59           | 0.85 | 0.66 | -0.11                                        | 2.51 |
| DFBR  | 0.53           | 0.84 | 0.61 | -0.11                                        | 2.72 | 0.47           | 0.82 | 0.56 | -0.13                                        | 3.03 |
| BABJ  | 0.73           | 0.85 | 0.73 | -0.28                                        | 2.64 | 0.72           | 0.85 | 0.72 | -0.08                                        | 2.55 |
| BABA  | 0.69           | 0.87 | 0.73 | 0.02                                         | 2.20 | 0.65           | 0.88 | 0.71 | -0.01                                        | 2.30 |
| BARR  | 0.68           | 0.89 | 0.74 | -0.05                                        | 1.95 | 0.68           | 0.90 | 0.74 | -0.14                                        | 1.95 |
| PIBJ  | 0.32           | 0.62 | 0.35 | -0.28                                        | 3.14 | 0.26           | 0.64 | 0.32 | -0.13                                        | 3.16 |
| MAAP  | 0.72           | 0.88 | 0.75 | 0.18                                         | 2.19 | 0.70           | 0.89 | 0.75 | -0.02                                        | 2.30 |
| MACA  | 0.54           | 0.86 | 0.63 | 0.39                                         | 2.85 | 0.49           | 0.82 | 0.58 | 0.21                                         | 3.04 |
| MABC  | 0.52           | 0.81 | 0.59 | -1.22                                        | 2.58 | 0.51           | 0.83 | 0.59 | -1.05                                        | 2.64 |
| TOTA  | 0.66           | 0.88 | 0.72 | -0.75                                        | 2.52 | 0.63           | 0.88 | 0.70 | -0.83                                        | 2.80 |
| TOPN  | 0.65           | 0.88 | 0.71 | -0.09                                        | 2.72 | 0.57           | 0.87 | 0.66 | -0.28                                        | 2.93 |
| TOPA  | 0.69           | 0.90 | 0.75 | -0.16                                        | 2.12 | 0.68           | 0.90 | 0.75 | -0.20                                        | 2.27 |
| PASF  | 0.36           | 0.69 | 0.41 | 1.33                                         | 3.03 | 0.31           | 0.60 | 0.33 | 1.26                                         | 3.14 |
| PAMA  | 0.59           | 0.86 | 0.66 | -0.88                                        | 2.58 | 0.55           | 0.86 | 0.64 | -0.86                                        | 2.74 |
| Mean  | 0.62           | 0.86 | 0.68 | -0.14                                        | 2.56 | 0.59           | 0.85 | 0.66 | -0.20                                        | 2.70 |

Table S4: Annual changes of maximum, minimum and mean air temperature and rainfall projected by seven global climate models (GCMs), in 31 Brazilian locations for mid-century (2040-2069), under an intermediate (RCP4.5) and high (RCP8.5) emission scenarios, when compared to the historical climate (1980-2009).

| Site | RCP4.5           |         |      |          | RCP8.5           |         |      |          |
|------|------------------|---------|------|----------|------------------|---------|------|----------|
|      | Temperature (°C) |         |      | Rain (%) | Temperature (°C) |         |      | Rain (%) |
|      | Maximum          | Minimum | Mean |          | Maximum          | Minimum | Mean |          |
| RSPE | 1.11             | 1.32    | 1.22 | 11.23    | 1.64             | 1.89    | 1.77 | 14.28    |
| RSCA | 1.47             | 1.52    | 1.50 | 8.62     | 2.06             | 2.28    | 2.17 | 7.98     |
| SCCN | 1.60             | 1.57    | 1.59 | 6.52     | 2.16             | 2.22    | 2.19 | 9.60     |
| SCCH | 1.76             | 1.65    | 1.71 | 5.12     | 2.37             | 2.38    | 2.38 | 7.84     |
| PRCA | 1.92             | 1.70    | 1.81 | 3.22     | 2.52             | 2.46    | 2.49 | 8.38     |
| PRLO | 2.08             | 1.71    | 1.90 | 1.97     | 2.69             | 2.62    | 2.66 | 3.94     |
| SPAV | 1.88             | 1.68    | 1.78 | 0.82     | 2.52             | 2.39    | 2.46 | 3.54     |
| SPFR | 2.11             | 1.84    | 1.98 | -2.00    | 2.82             | 2.62    | 2.72 | 1.22     |
| SPVO | 2.27             | 1.85    | 2.06 | -1.23    | 2.92             | 2.75    | 2.84 | 5.78     |
| MGBA | 1.97             | 1.62    | 1.80 | -3.27    | 2.65             | 2.38    | 2.52 | 0.53     |
| MGUB | 2.17             | 1.83    | 2.00 | -3.74    | 2.83             | 2.62    | 2.73 | 0.87     |
| MGPM | 2.15             | 1.91    | 2.03 | -9.09    | 2.83             | 2.67    | 2.75 | -2.43    |
| MGUN | 2.12             | 1.87    | 2.00 | -10.66   | 2.82             | 2.64    | 2.73 | -7.60    |
| MSIV | 2.28             | 1.92    | 2.10 | 1.47     | 2.96             | 2.74    | 2.85 | 4.19     |
| MSPA | 2.27             | 1.91    | 2.09 | -1.07    | 2.92             | 2.68    | 2.80 | 6.52     |
| MTDI | 2.39             | 2.02    | 2.21 | -4.92    | 3.10             | 2.88    | 2.99 | 1.84     |
| GOCA | 2.21             | 1.93    | 2.07 | -7.27    | 2.86             | 2.68    | 2.77 | -1.70    |
| GOJA | 2.31             | 1.92    | 2.12 | -8.03    | 3.01             | 2.67    | 2.84 | -0.39    |
| DFBR | 2.13             | 1.89    | 2.01 | -9.88    | 2.86             | 2.65    | 2.76 | -6.48    |
| BABJ | 1.94             | 1.57    | 1.76 | -15.39   | 2.56             | 2.20    | 2.38 | -11.72   |
| BABA | 2.07             | 1.80    | 1.94 | -18.18   | 2.81             | 2.56    | 2.69 | -16.52   |
| BARR | 1.91             | 1.72    | 1.82 | -17.51   | 2.61             | 2.39    | 2.50 | -16.23   |
| PIBJ | 1.95             | 1.87    | 1.91 | -16.37   | 2.69             | 2.70    | 2.70 | -20.83   |
| MAAP | 1.97             | 1.76    | 1.87 | -14.18   | 2.72             | 2.50    | 2.61 | -20.83   |
| MACA | 2.02             | 1.84    | 1.93 | -10.83   | 2.78             | 2.69    | 2.74 | -16.39   |
| MABC | 1.82             | 1.72    | 1.77 | -12.20   | 2.57             | 2.49    | 2.53 | -15.70   |
| TOTA | 2.08             | 1.88    | 1.98 | -15.22   | 2.84             | 2.66    | 2.75 | -13.94   |
| TOPN | 2.09             | 1.87    | 1.98 | -14.88   | 2.89             | 2.72    | 2.81 | -16.19   |
| TOPA | 2.08             | 1.90    | 1.99 | -15.03   | 2.85             | 2.66    | 2.76 | -13.52   |
| PASF | 2.15             | 2.01    | 2.08 | -7.32    | 3.02             | 2.86    | 2.94 | -11.87   |
| PAMA | 1.93             | 1.84    | 1.89 | -12.22   | 2.77             | 2.66    | 2.72 | -18.70   |
| Mean | 2.01             | 1.79    | 1.90 | -6.18    | 2.70             | 2.56    | 2.63 | -4.34    |

Table S5: Annual changes of maximum, minimum and mean air temperature and rainfall projected by seven global climate models (GCMs), in 31 Brazilian locations for end-of-century (2070-2099), under an intermediate (RCP4.5) and high (RCP8.5) emission scenarios, when compared to the historical climate (1980-2009).

| Site | RCP4.5           |         |      |          | RCP8.5           |         |      |          |
|------|------------------|---------|------|----------|------------------|---------|------|----------|
|      | Temperature (°C) |         |      | Rain (%) | Temperature (°C) |         |      | Rain (%) |
|      | Maximum          | Minimum | Mean |          | Maximum          | Minimum | Mean |          |
| RSPE | 1.61             | 1.81    | 1.71 | 9.72     | 2.98             | 3.38    | 3.18 | 18.08    |
| RSCA | 2.08             | 2.05    | 2.07 | 4.57     | 3.73             | 3.96    | 3.85 | 13.38    |
| SCCN | 2.08             | 2.04    | 2.06 | 7.95     | 3.79             | 3.92    | 3.86 | 19.38    |
| SCCH | 2.28             | 2.15    | 2.22 | 4.11     | 4.14             | 4.20    | 4.17 | 14.10    |
| PRCA | 2.42             | 2.16    | 2.29 | 5.52     | 4.27             | 4.21    | 4.24 | 13.76    |
| PRLO | 2.56             | 2.18    | 2.37 | 1.08     | 4.58             | 4.38    | 4.48 | 9.03     |
| SPAV | 2.36             | 2.10    | 2.23 | 1.68     | 4.34             | 4.12    | 4.23 | 8.84     |
| SPFR | 2.60             | 2.30    | 2.45 | -1.12    | 4.76             | 4.60    | 4.68 | -0.72    |
| SPVO | 2.75             | 2.32    | 2.54 | -0.64    | 4.99             | 4.55    | 4.77 | 3.45     |
| MGBA | 2.47             | 2.08    | 2.28 | -2.82    | 4.53             | 4.08    | 4.31 | -2.78    |
| MGUB | 2.63             | 2.34    | 2.49 | -2.42    | 4.84             | 4.53    | 4.69 | -1.10    |
| MGPM | 2.64             | 2.36    | 2.50 | -6.92    | 4.81             | 4.46    | 4.64 | -8.07    |
| MGUN | 2.62             | 2.33    | 2.48 | -9.63    | 4.78             | 4.37    | 4.58 | -12.92   |
| MSIV | 2.83             | 2.38    | 2.61 | -1.91    | 5.11             | 4.65    | 4.88 | 2.38     |
| MSPA | 2.74             | 2.38    | 2.56 | 0.13     | 5.03             | 4.48    | 4.76 | 4.88     |
| MTDI | 2.94             | 2.50    | 2.72 | -5.03    | 5.28             | 4.74    | 5.01 | -3.94    |
| GOCA | 2.69             | 2.39    | 2.54 | -6.02    | 4.91             | 4.51    | 4.71 | -5.54    |
| GOJA | 2.84             | 2.41    | 2.63 | -6.94    | 5.13             | 4.51    | 4.82 | -5.89    |
| DFBR | 2.64             | 2.33    | 2.49 | -9.56    | 4.84             | 4.43    | 4.64 | -13.26   |
| BABJ | 2.33             | 1.88    | 2.11 | -12.65   | 4.28             | 3.82    | 4.05 | -24.18   |
| BABA | 2.59             | 2.27    | 2.43 | -15.44   | 4.69             | 4.35    | 4.52 | -26.60   |
| BARR | 2.38             | 2.11    | 2.25 | -18.16   | 4.34             | 4.11    | 4.23 | -31.46   |
| PIBJ | 2.48             | 2.37    | 2.43 | -17.01   | 4.56             | 4.51    | 4.54 | -27.76   |
| MAAP | 2.48             | 2.19    | 2.34 | -13.44   | 4.59             | 4.30    | 4.45 | -30.17   |
| MACA | 2.54             | 2.34    | 2.44 | -19.98   | 4.76             | 4.62    | 4.69 | -29.57   |
| MABC | 2.42             | 2.15    | 2.29 | -21.97   | 4.44             | 4.16    | 4.30 | -29.87   |
| TOTA | 2.62             | 2.34    | 2.48 | -10.37   | 4.78             | 4.52    | 4.65 | -21.15   |
| TOPN | 2.62             | 2.34    | 2.48 | -12.53   | 4.93             | 4.60    | 4.77 | -20.95   |
| TOPA | 2.62             | 2.36    | 2.49 | -9.73    | 4.80             | 4.53    | 4.67 | -21.34   |
| PASF | 2.77             | 2.56    | 2.67 | -16.06   | 5.24             | 4.93    | 5.09 | -26.82   |
| PAMA | 2.56             | 2.32    | 2.44 | -21.62   | 4.78             | 4.47    | 4.63 | -30.53   |
| Mean | 2.52             | 2.25    | 2.39 | -6.68    | 4.61             | 4.35    | 4.48 | -8.62    |
